# Supplementary material
Source: publisher figshare collection journal article supplement (https://acs.figshare.com/ndownloader/files/4728739)
Supplement: Supplementary file 1 [file 4728739]

## Supporting Information

### Hydrologic flow controls on biologic iron(III) reduction in natural sediments

Morgan L. Minyard<sup>1</sup> and William D. Burgos<sup>1,\*</sup>

<sup>1</sup> Department of Civil and Environmental Engineering, The Pennsylvania State University

\* Corresponding author; address: 212 Sackett Building, University Park, PA, 16802-1408; telephone: 814-863-0578; fax: 814-863-7304; e-mail: [wdb3@psu.edu](mailto:wdb3@psu.edu)

S2 – Supp. Info. Figure S1. <sup>3</sup>H breakthrough curves from two of the columns operated at 11.1 pore volumes (PV) d<sup>-1</sup>. Open squares and closed circles represent the two replicate data sets, and solid line represents the influent <sup>3</sup>H concentration (disintegrations per minute). <sup>3</sup>H breakthrough curves were used to define the PV as the volume displaced between the time when <sup>3</sup>H was statistically greater than the background concentration to the time when <sup>3</sup>H was statistically inseparable from preceding and proceeding values. The <sup>3</sup>H breakthrough curves were analyzed to calculate a pore volume of 2.60±0.13 mL (equivalent to a porosity of 0.44 v/v) and a dispersivity of 0.01 cm.

S3 – Supp. Info. Figure S2. Final biomass concentrations and distributions measured at the conclusion of the column experiments. Phosphate-extractable cells were determined by combining ~1/9 of the column contents with 5 mL of 20 mM Na<sub>2</sub>HPO<sub>4</sub> (pH 7.0). The phosphate-sand suspension was vortex mixed for one minute, allowed to settle overnight, and cells in the overlying water were enumerated by acridine orange direct counts (AODC) using a Zeiss Axiophot microscope (Jena, Germany) based upon the average from 5 field counts (each field being 2.64 x 10<sup>-4</sup> cm<sup>2</sup>) for each slide (three slides per column region). Symbols represent mean values from influent (closed squares), middle (open squares), and effluent (open crosses) regions of the column.

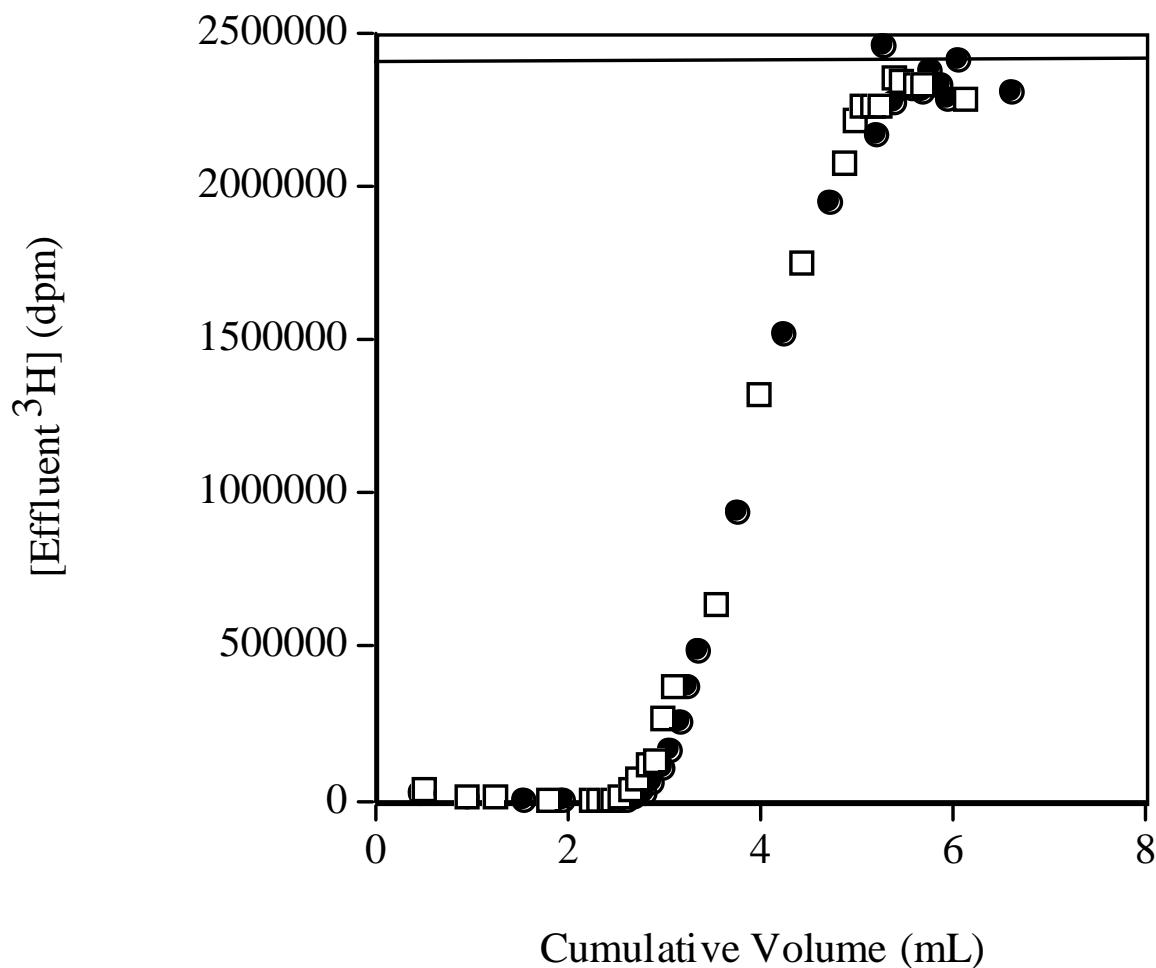

**Supporting Information Figure S1.**  $^3\text{H}$  breakthrough curves from two of the columns operated at 11.1 pore volumes (PV)  $\text{d}^{-1}$ . Open squares and closed circles represent the two replicate data sets, and solid line represents the influent  $^3\text{H}$  concentration (disintegrations per minute).  $^3\text{H}$  breakthrough curves were used to define the PV as the volume displaced between the time when  $^3\text{H}$  was statistically greater than the background concentration to the time when  $^3\text{H}$  was statistically inseparable from preceding and proceeding values. The  $^3\text{H}$  breakthrough curves were analyzed to calculate a pore volume of  $2.60 \pm 0.13$  mL (equivalent to a porosity of 0.44 v/v) and a dispersivity of 0.01 cm.

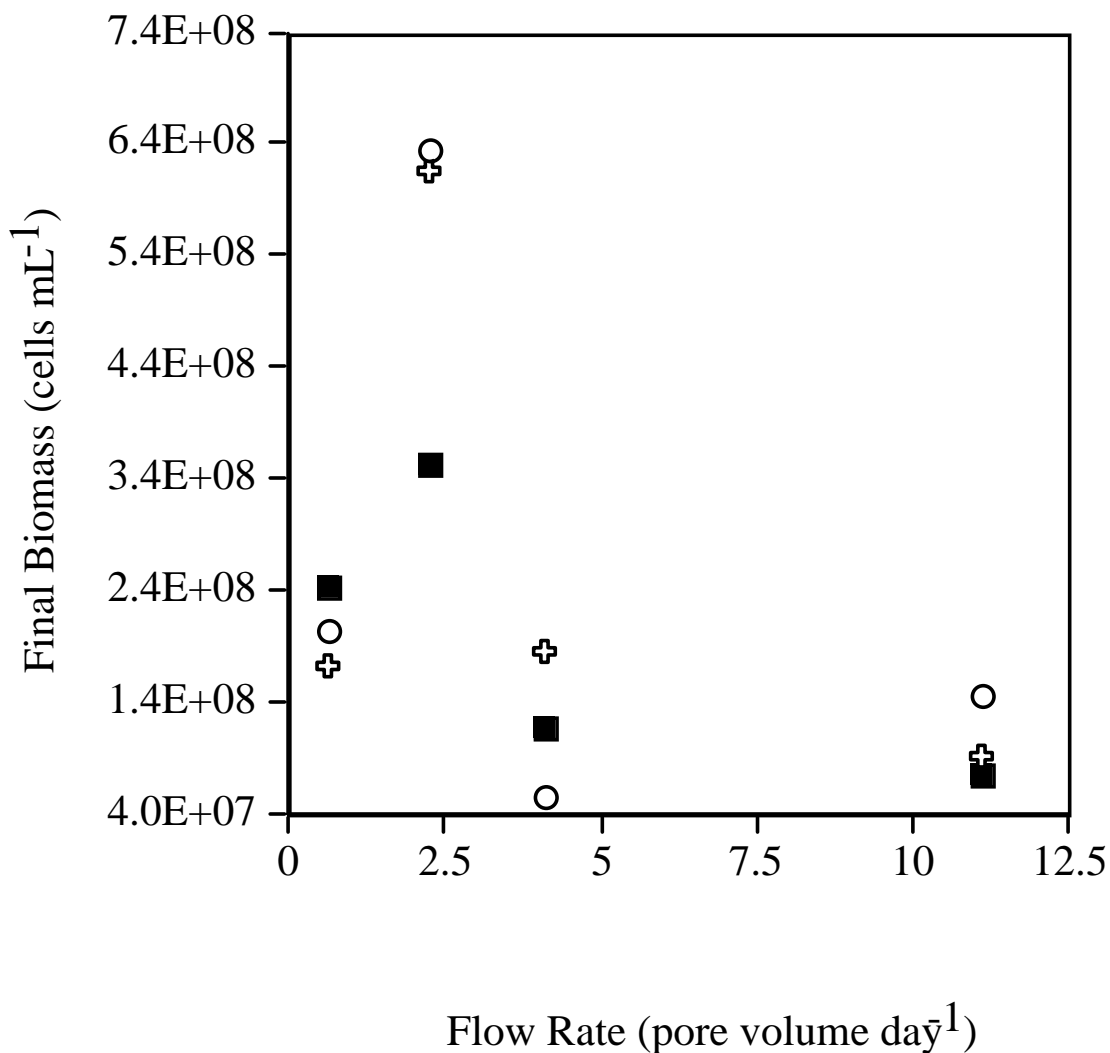

**Supporting Information Figure S2.** Final biomass concentrations and distributions measured at the conclusion of the column experiments. Phosphate-extractable cells were determined by combining ~1/9 of the column contents with 5 mL of 20 mM Na<sub>2</sub>HPO<sub>4</sub> (pH 7.0). The phosphate-sand suspension was vortex mixed for one minute, allowed to settle overnight, and cells in the overlying water were enumerated by acridine orange direct counts (AODC) using a Zeiss Axiophot microscope (Jena, Germany) based upon the average from 5 field counts (each field being 2.64 x 10<sup>-4</sup> cm<sup>2</sup>) for each slide (three slides per column region). Symbols represent mean values from influent (closed squares), middle (open squares), and effluent (open crosses) regions of the column.
